# Supplementary material
Source: PubMed Central journal article supplement (PMC4656727)
Supplement: ajcr0005-3015-f7.pdf [file ajcr0005-3015-f7.pdf]

## Supplementary materials

### MiRNAs, siRNAs and primers

Chemically synthesized miRNAs and siRNAs without modifications were purchased from Genepharma, China, and had the following sequences:

Primers: miR-101-3p sense strand: 5'-UACAGUACUGUGAUACUGAA-3' X; antisense strand: 5'-CAGUUAUCACAGUACUGUAUU-3'; U6 sense strand: 5'-GCUUCGCGCAGCACAUUACUAAAAU-3'; antisense strand: 5'-CGCUUCACGAAUUUGCGUGUCAU-3'; anti-miR-101-3p: 5'-UUCAGUUAUCACAGUACUGUA-3'; Pim-1 sense strand: 5'-CGAGCATGACGAAGAGATCAT-3'; antisense strand: 5'-TCGAAGTTGGCCTATCTGA-3'. siRNA: Pim-1 siRNA sense strand: 5'-GGAACAACAUUUACAACUCdTdT-3'; antisense strand: 5'-GAGUUGUAAUUGUUGUCCdTdT-3'.

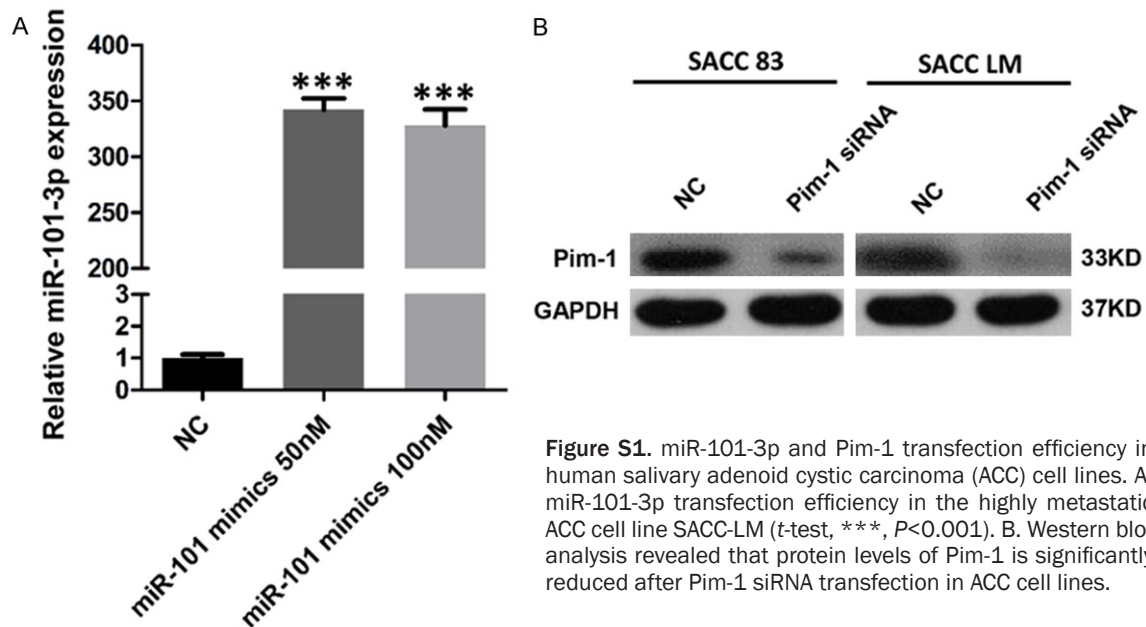

**Figure S1.** miR-101-3p and Pim-1 transfection efficiency in human salivary adenoid cystic carcinoma (ACC) cell lines. A. miR-101-3p transfection efficiency in the highly metastatic ACC cell line SACC-LM (t-test, \*\*\*,  $P < 0.001$ ). B. Western blot analysis revealed that protein levels of Pim-1 is significantly reduced after Pim-1 siRNA transfection in ACC cell lines.
